# Supplementary material for: Depolymerization of cellulose to glucose by oxidation–hydrolysis
Source: Royal Society of Chemistry journal article supplement (doi:10.1039/c4gc02151g), 2014-12-03
Supplement: c4gc02151g1.pdf [file c4gc02151g1.pdf]

## Electronic supplementary information for

### Depolymerization of cellulose to glucose by oxidation-hydrolysis

Lipeng Zhou, Xiaomei Yang\*, Jiaolong Xu, Meiting Shi, Feng Wang, Chen Chen, Jie Xu

**Table S1**

The DP and acid amount of  $\alpha$ -cellulose after oxidation treatment by air<sup>a</sup>

| Sample                     | Acid amount<br>(mmol/g) | DP  | Conversion<br>(%) | TRS yield<br>(%) | Glucose<br>yield (%) |
|----------------------------|-------------------------|-----|-------------------|------------------|----------------------|
| $\alpha$ -cellulose-150-24 | 0.04                    | 945 | 12.9              | 4.8              | 0.3                  |
| $\alpha$ -cellulose-180-24 | 0.07                    | 375 | 18.6              | 8.3              | 0.7                  |
| $\alpha$ -cellulose-210-3  | 0.10                    | 470 | 15.8              | 6.3              | 1.3                  |
| $\alpha$ -cellulose-210-6  | 0.15                    | 318 | 19.9              | 9.1              | 2.0                  |
| $\alpha$ -cellulose-210-12 | 0.20                    | 180 | 29.3              | 12.4             | 4.1                  |
| $\alpha$ -cellulose-210-24 | 0.28                    | 137 | 36.9              | 20.6             | 7.6                  |
| $\alpha$ -cellulose-210-36 | 0.52                    | 96  | 43.0              | 26.2             | 13.4                 |
| $\alpha$ -cellulose-210-48 | 0.54                    | 74  | 47.7              | 30.7             | 16.3                 |

<sup>a</sup> Hydrolysis reaction conditions: cellulose (0.3 g), H<sub>2</sub>O (30 mL), 1.0 MPa N<sub>2</sub>, 150 °C, 8 h.

**Table S2**Influence of the weight ratio of cellulose/water on the hydrolysis of  $\alpha$ -cellulose<sup>a</sup>

| Cellulose/water<br>(w/w) | Conversion<br>(%) | TRS<br>yield (%) | Glucose<br>yield (%) |
|--------------------------|-------------------|------------------|----------------------|
| 0.01                     | 47.7              | 30.7             | 16.3                 |
| 0.05                     | 42.4              | 36.8             | 21.2                 |
| 0.10                     | 40.6              | 33.0             | 22.2                 |
| 0.20                     | 40.7              | 34.9             | 23.3                 |
| 0.30                     | 39.1              | 38.2             | 17.7                 |
| 0.40                     | 40.7              | 30.9             | 17.9                 |

<sup>a</sup> Reaction conditions: H<sub>2</sub>O (30 mL), 150 °C, 8 h, 1.0 MPa N<sub>2</sub>,  $\alpha$ -cellulose oxidized by air at 210 °C for 48 h was used as the substrate.

**Table S3**The results of three preoxidation-hydrolysis runs for MCC<sup>a</sup>

| Reaction runs      | Mass of cellulose for hydrolysis (g) | Conversion (%) | TRS yield (%) | Glucose yield (%) |
|--------------------|--------------------------------------|----------------|---------------|-------------------|
| 1 <sup>st</sup>    | 3.0023                               | 38.5           | 36.7          | 25.2              |
| 2 <sup>nd</sup>    | 1.2653                               | 48.8           | 45.0          | 38.2              |
| 3 <sup>rd</sup>    | 0.2915                               | 38.2           | 30.8          | 24.4              |
| Total <sup>b</sup> | -                                    | 94.0           | 58.6          | 43.4              |

<sup>a</sup>After hydrolysis reaction, the residue was washed twice with water and ethanol separately. After drying at 110 °C for 8 h, the obtained solid was oxidized by air at 210 °C for 48 h. Hydrolysis reaction conditions: cellulose/water = 0.1 g/mL, 1.0 MPa N<sub>2</sub>, 170 °C, 8 h.

<sup>b</sup>Total conversion = the weight of the solid residue after the 3<sup>rd</sup> run/ the initial cellulose weight.

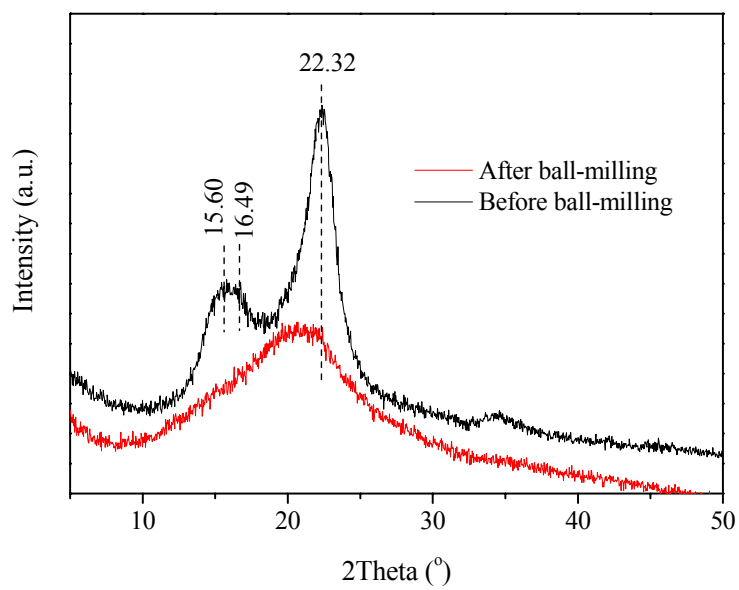

**Fig. S1** XRD patterns of  $\alpha$ -cellulose before and after ball-milling.

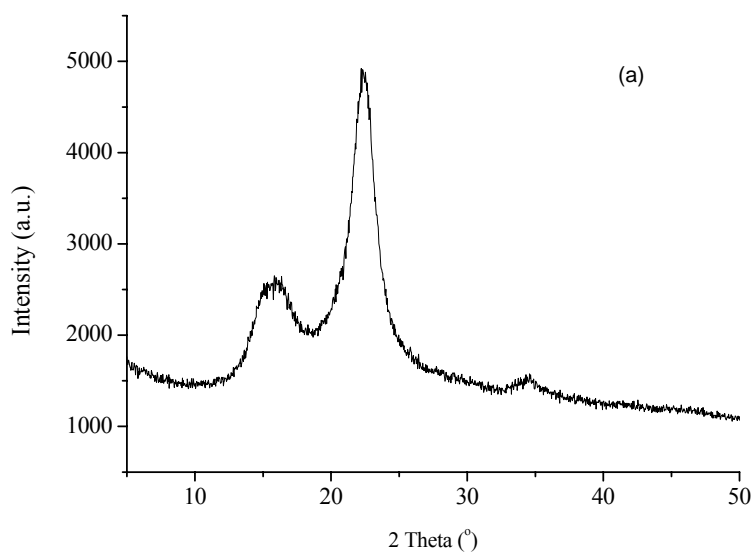

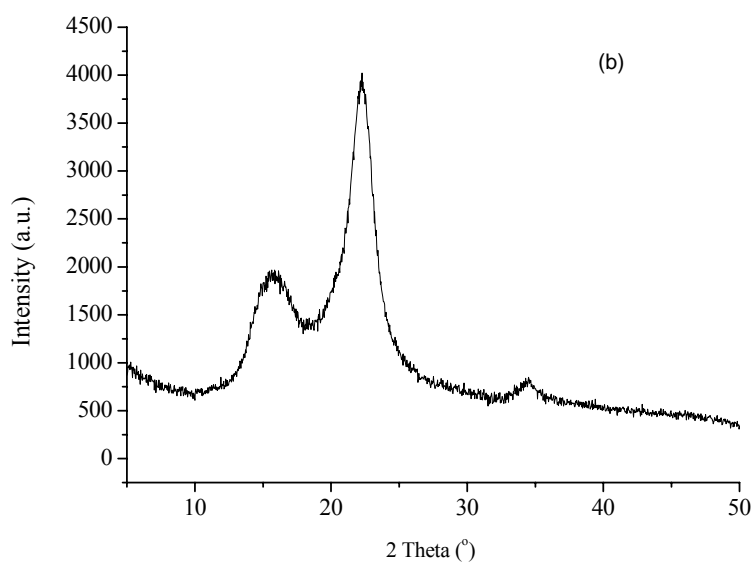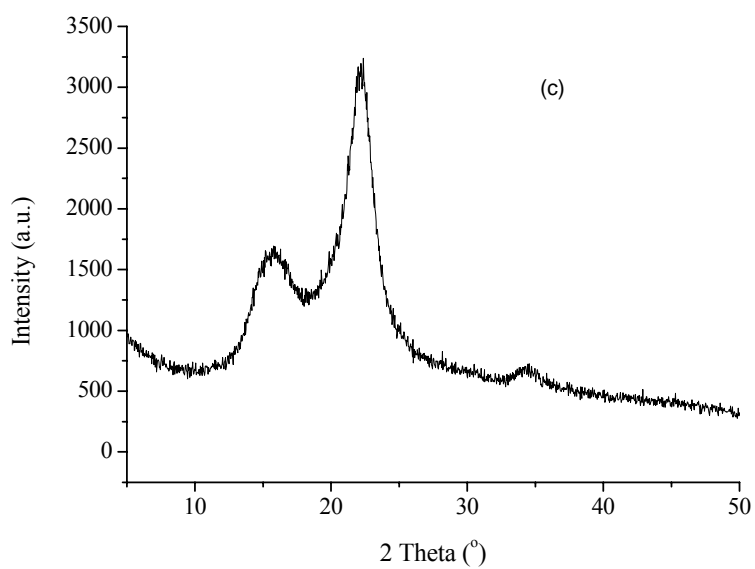

**Fig. S2** XRD patterns of  $\alpha$ -cellulose after oxidation in a tube furnace with a quartz tube reactor by  $NO_2$  (a),  $O_2$  (b) and air (c).

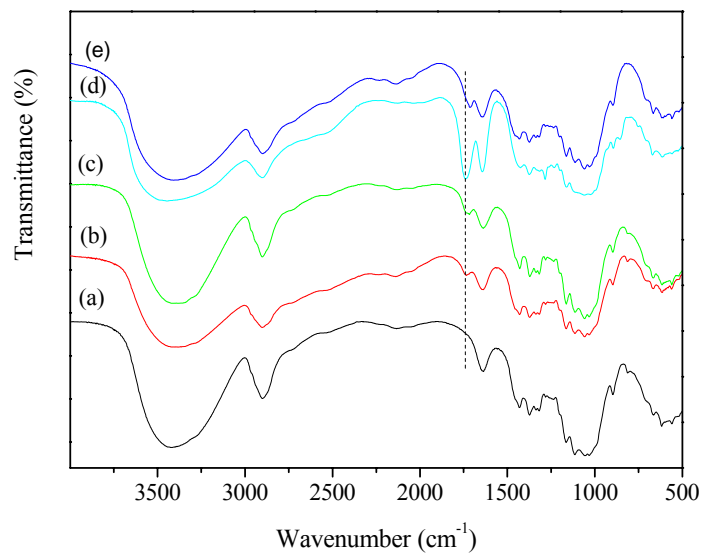

**Fig. S3** FTIR spectra of  $\alpha$ -cellulose without pretreatment (a),  $\alpha$ -cellulose-H<sub>2</sub>O<sub>2</sub> (b),  $\alpha$ -cellulose-KMnO<sub>4</sub> (c),  $\alpha$ -cellulose-HNO<sub>3</sub>-NaNO<sub>2</sub> (d), and  $\alpha$ -cellulose-TEMPO-NaClO (e).

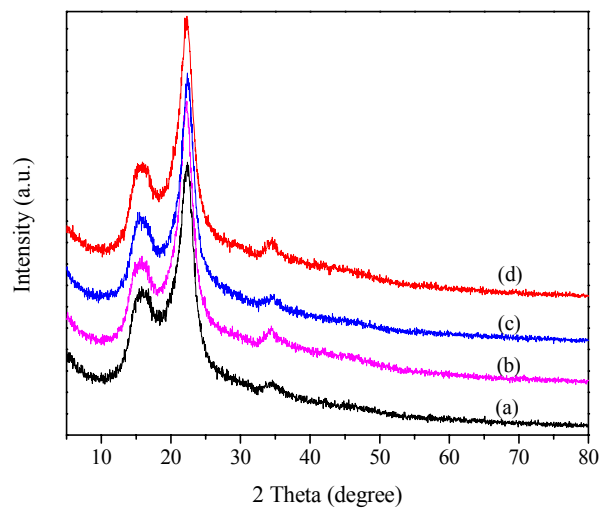

**Fig. S4** XRD patterns of  $\alpha$ -cellulose (a) and  $\alpha$ -cellulose oxidized by air:  $\alpha$ -cellulose-210-12 (b) and  $\alpha$ -cellulose-210-24 (c) and  $\alpha$ -cellulose-210-48 (d)

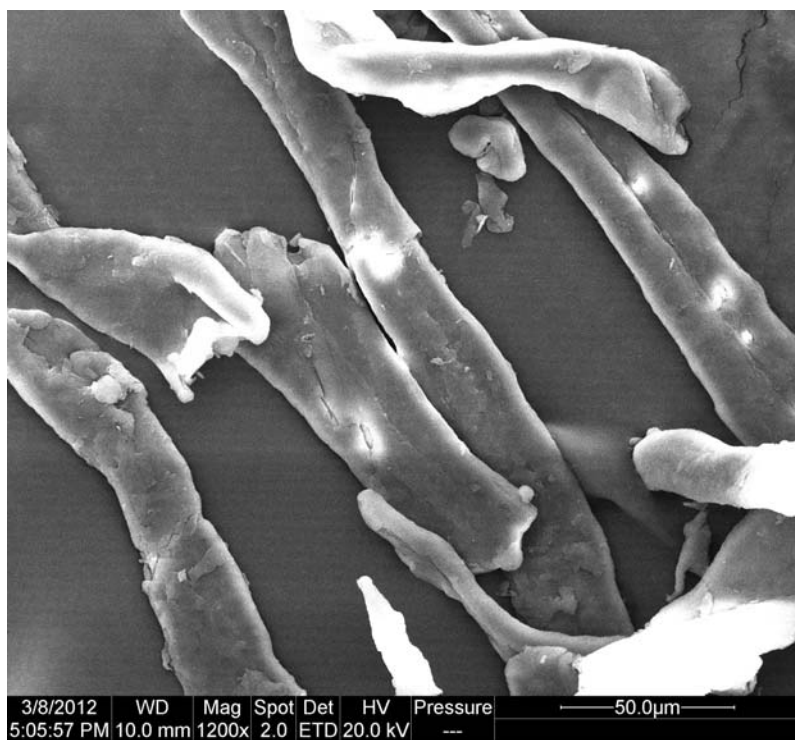

(a)

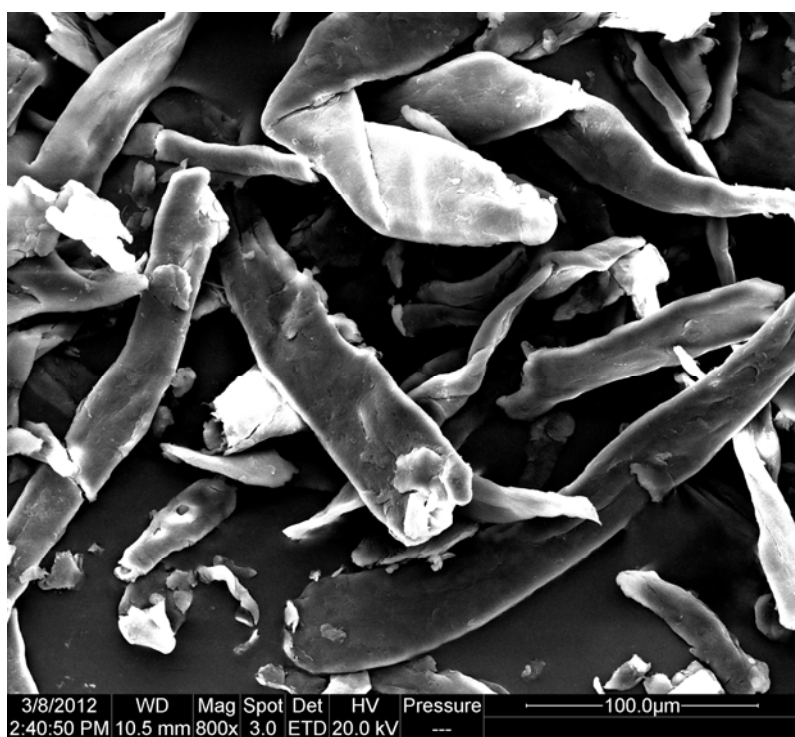

(b)

**Fig. S5** SEM images of  $\alpha$ -cellulose before (a) and after oxidation in air (b).

(a)

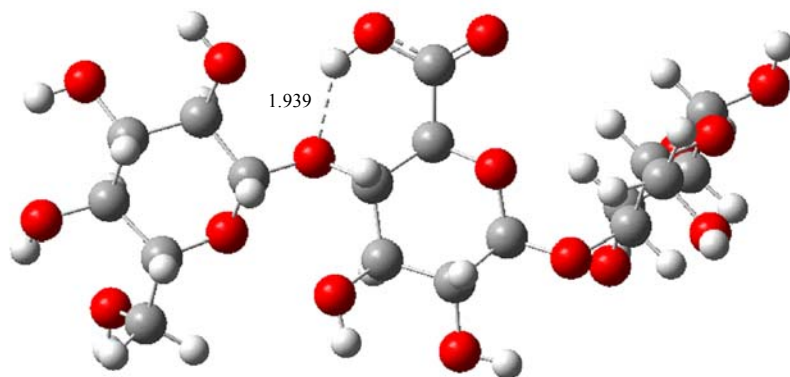

(b)

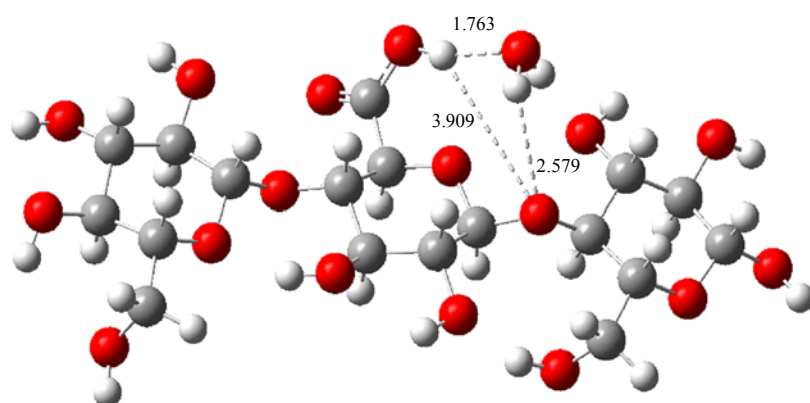

**Fig. S6** Theoretical calculations of the structure for hydrolysis of glycosidic bond located on both sides of  $\text{-COOH}$ .



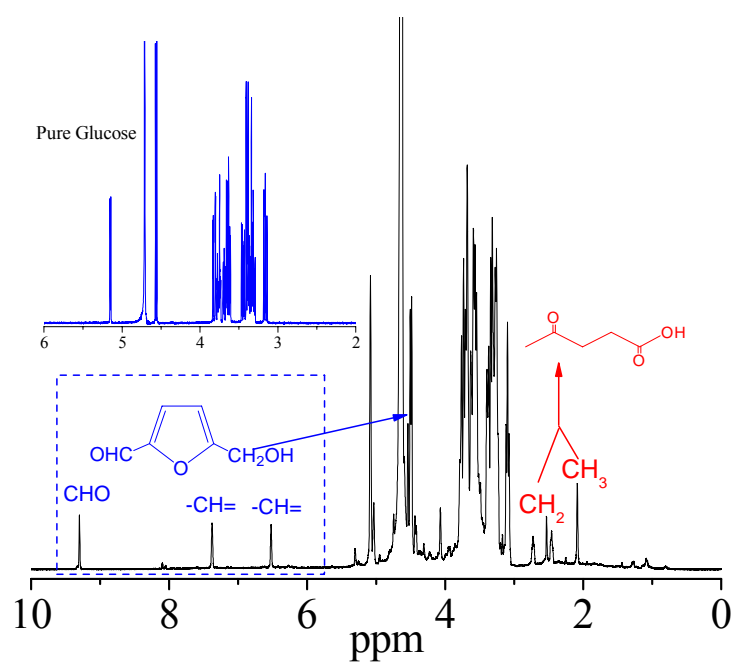

**Fig. S7**  $^1\text{H}$  NMR spectra of the aqueous phase recovered after the catalytic hydrolysis of  $\alpha$ -cellulose.

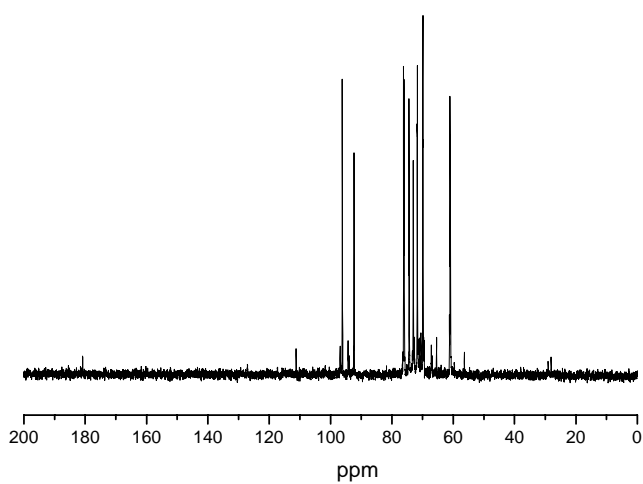

**Fig. S8**  $^{13}\text{C}$  NMR spectra of the aqueous phase recovered after the catalytic hydrolysis of  $\alpha$ -cellulose.

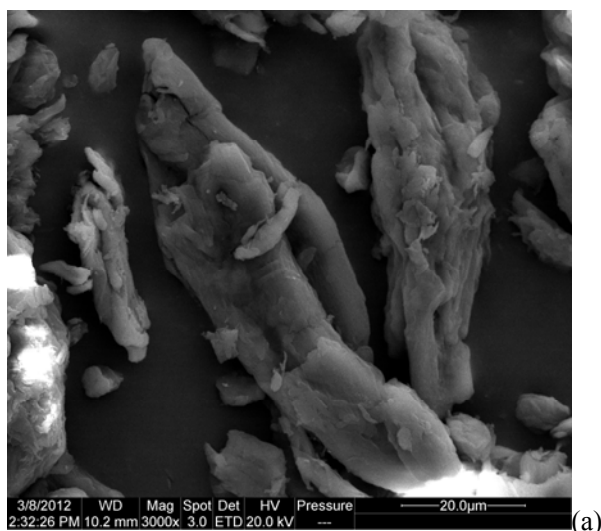

(a)

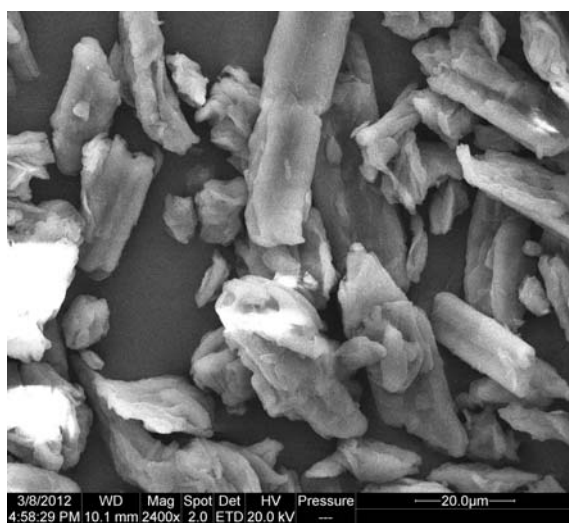

(b)

**Fig. S9** SEM images of MCC before (a) and after oxidation by air (b).

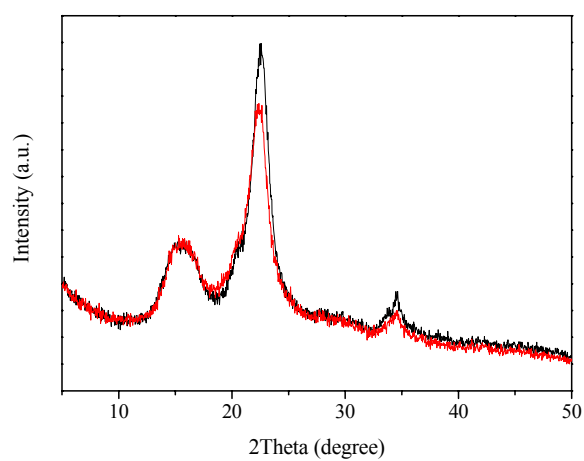

**Fig. S10** XRD patterns of MCC parent (black) and after oxidation by air (red).

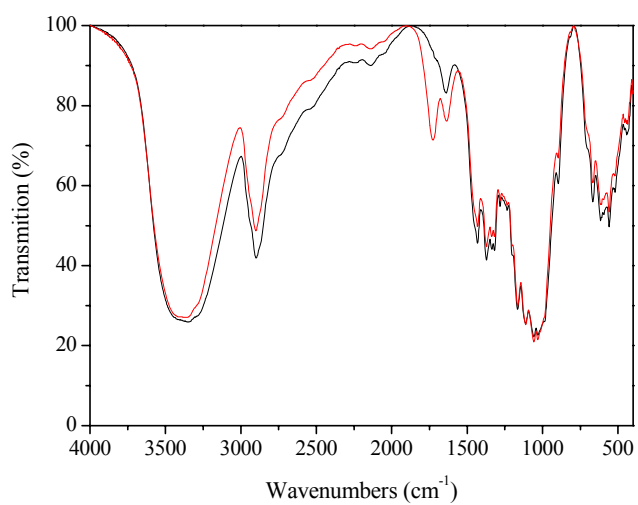

**Fig. S11** FTIR spectra of parent MCC (black) and MCC after oxidation by air (red).

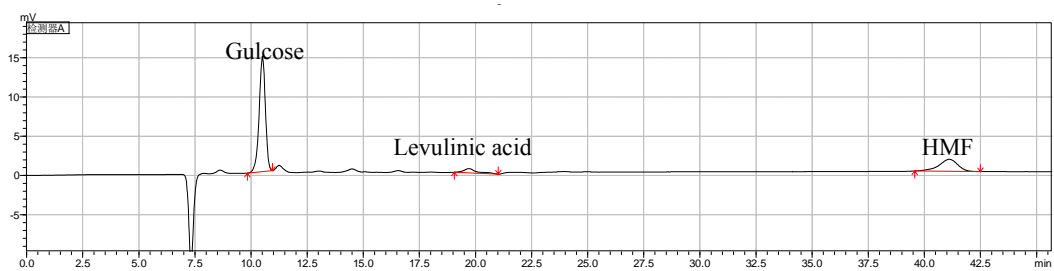

**Fig. S12** HPLC results of MCC hydrolysis.

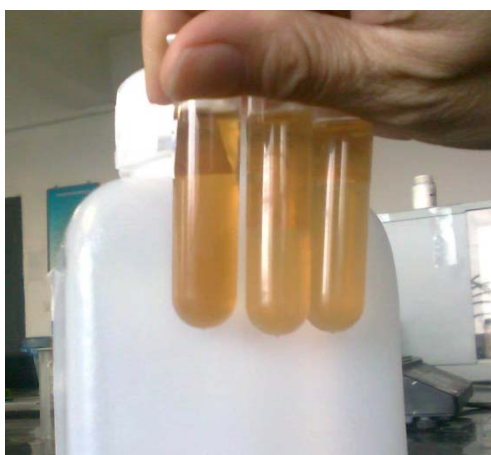

**Fig. S13** The picture of the aqueous phase recovered after hydrolysis of oxidized MCC.
